# Supplementary material for: Investigating the impact of reanalysis snow input on an observationally calibrated snow-on-sea-ice reconstruction
Source: Copernicus journal article supplement (doi:10.5194/tc-19-3033-2025), 2025-08-13
Supplement: Supplementary file 1 [file tc-19-3033-2025-supplement.zip]

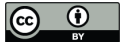

## *Supplement of*

# **Investigating the impact of reanalysis snow input on an observationally calibrated snow-on-sea-ice reconstruction**

**Alex Cabaj et al.**

*Correspondence to:* Alex Cabaj (alex.cabaj@ec.gc.ca)

- tc-19-3033-2025-supplement-title-page.pdf
- monthly\_clim\_iav\_trend\_data
  - monthly\_clim\_dens\_1980\_2021.csv
  - monthly\_clim\_depth\_1980\_2021.csv
  - monthly\_clim\_ice\_area\_1980\_2021.csv
  - monthly\_clim\_sf\_ocn\_no\_cs\_1980\_2021.csv
  - monthly\_clim\_sf\_ocn\_with\_cs\_1980\_2021.csv
  - monthly\_clim\_sf\_si\_no\_cs\_1980\_2021.csv
  - monthly\_clim\_sf\_si\_with\_cs\_1980\_2021.csv
  - monthly\_clim\_snow\_vol\_1980\_2021.csv
  - monthly\_iav\_dens\_1980\_2021.csv
  - monthly\_iav\_depth\_1980\_2021.csv
  - monthly\_iav\_ice\_area\_1980\_2021.csv
  - monthly\_iav\_sf\_ocn\_no\_cs\_1980\_2021.csv
  - monthly\_iav\_sf\_ocn\_with\_cs\_1980\_2021.csv
  - monthly\_iav\_sf\_si\_no\_cs\_1980\_2021.csv
  - monthly\_iav\_sf\_si\_with\_cs\_1980\_2021.csv
  - monthly\_iav\_snow\_vol\_1980\_2021.csv
  - monthly\_trend\_dens\_1980\_2021.csv
  - monthly\_trend\_depth\_1980\_2021.csv
  - monthly\_trend\_high\_dens\_1980\_2021.csv
  - monthly\_trend\_high\_depth\_1980\_2021.csv
  - monthly\_trend\_high\_ice\_area\_1980\_2021.csv
  - monthly\_trend\_high\_sf\_si\_1980\_2021.csv

- monthly\_trend\_high\_snow\_vol\_1980\_2021.csv
- monthly\_trend\_ice\_area\_1980\_2021.csv
- monthly\_trend\_low\_dens\_1980\_2021.csv
- monthly\_trend\_low\_depth\_1980\_2021.csv
- monthly\_trend\_low\_ice\_area\_1980\_2021.csv
- monthly\_trend\_low\_sf\_si\_1980\_2021.csv
- monthly\_trend\_low\_snow\_vol\_1980\_2021.csv
- monthly\_trend\_sf\_si\_1980\_2021.csv
- monthly\_trend\_snow\_vol\_1980\_2021.csv
- readme.txt

The copyright of individual parts of the supplement might differ from the article licence.
